# Supplementary material for: Evaluation of Codon Biology in Citrus and Poncirus trifoliata Based on Genomic Features and Frame Corrected Expressed Sequence Tags
Source: PubMed Central journal article supplement — DNA Res. 2013 Jan 11;20(2):135–50. doi: 10.1093/dnares/dss039 (PMC3628444; doi:10.1093/dnares/dss039), 2013-01-11

## Supplementary Tables Legends

**Supplementary Table 1.** Summary of the average RSCU in *Citrus* species and *P. trifoliata*. AA represents amino acid. The highest RSCU of codons for each amino acid is indicated with asterik (\*), evaluated using a  $\chi^2$  contingency test. Species are in the following order: A=*C. sinensis*; B=*C. aurantifolia*; C=*C. aurantium*; D=*C. clementina*; E=*C. clementina* × *C. tangerina*; F=*C. jambhiri*; G=*C. japonica var margarita*; H= *C. limettioides*; I=*C. limonia*; J=*C. medica*; K=*C. reshni*; L=*C. reticulata*; M=*C. reticulata* × *C. temple*; N=*C. sinensis* × *P. trifoliata*; O=*C. sunki*; P=*P. trifoliata*; Q=*C. unshiu*; R=*C. paradisi*; S=*C. paradisi* × *P. trifoliata*.

**Supplementary Table 2.** GC<sub>3</sub> variation and stress association across *Citrus* species and *P. trifoliata*.

## Supplementary Figures Legends

**Supplementary Figure 1.** Plot for coordinates of first two major axes of correspondence analysis on RSCU for *Citrus* species and *P. trifoliata* genes. The genes have been classified according to the GC<sub>3s</sub> richness. Species are in the following order: A=*C. sinensis*; B=*C. aurantifolia*; C=*C. aurantium*; D=*C. clementina*; E=*C. clementina* × *C. tangerina*; F= *C. jambhiri*; G=*C. japonica var margarita*; H=*C. limettioides*; I=*C. limonia*; J=*C. medica*; K=*C. reshni*; L=*C. reticulata*; M=*C. reticulata* × *C. temple*; N=*C. sinensis* × *P. trifoliata*; O=*C. sunki*; P=*P. trifoliata*; Q=*C. unshiu*; R=*C. paradisi*; S=*C. paradisi* × *P. trifoliata*.

**Supplementary Figure 2.** CG<sub>3</sub> skew across *Citrus* species and *P.trifoliata*. Species order: A=*C. sinensis*; B= *C. aurantifolia*; C= *C. aurantium*; D=*C. clementina*; E=*C. clementina* × *C.tangerina*; F=*C. jambhiri*; G=*C japonica var margarita*; H=*C. limettioides*; I=*C. limonia*; J=*C. medica*; K=*C. reshni*; L=*C. reticulata*; M=*C. reticulata* × *C. temple*; N=*C. sinensis* × *P. trifoliata*; O=*C. sunki*; P=*P. trifoliata*; Q=*C. unshiu*; R=*C. paradisi*; S=*C. paradisi* × *P.trifoliata*. These plots show gradients of CG<sub>3</sub> skew for 5% of GC<sub>3</sub>-rich and GC<sub>3</sub>-poor genes for all analyzed genomes. Gradients from 5' and 3' ends of the CDS are shown in the same plot, separated by a vertical line.

**Supplementary Figure 3A.** An overview of *Citrus* phylogeny using the genome and frame corrected coding regions: All the proteins were compared and a suggestive

phylogeny was build on the basis of the co-orthologous proteins. In the figure, branch labels show the number of common genes in the subtrees. Branch lengths represent the number of new common genes since the last node.

**Supplementary Figure 3B.** An overview of *Citrus* phylogeny using the genome and frame corrected coding regions: Phylogenetic tree obtained in figure 3 A was re-rooted using *P. trifoliata* as an out-group species. In the figure, branch labels show the number of common genes in the subtrees. Branch lengths represent the number of new common genes since the last node.

Supplementary Table 1. Summary of the average RSCU in *Citrus* species and *P.trifoliata*. AA represents amino acid. The highest RSCU of codons for each amino acid is indicated with asterisk (\*), evaluated using a  $\chi^2$  contingency test. Species are in the following order: A=*C. sinensis*; B=*C. aurantifolia*; C=*C. aurantium*; D=*C. clementina*; E=*C. clementina* × *C. tangerina*; F=*C. jambhiri*; G=*C. japonica var margarita*; H=*C. limettoides*; I=*C. limonia*; J=*C. medica*; K=*C. reshni*; L=*C. reticulata*; M=*C. reticulata* × *C. temple*; N=*C. sinensis* × *P. trifoliata*; O=*C. sunki*; P=*P. trifoliata*; Q=*C. unshiu*; R=*C. paradisi*; and S=*C. paradisi* × *P. trifoliata*.

| AA  | Codon | A    | B    | C    | D    | E    | F    | G    | H    | I    | J    | K    | L    | M    | N    | O    | P    | Q    | R    | S    |
|-----|-------|------|------|------|------|------|------|------|------|------|------|------|------|------|------|------|------|------|------|------|
| Phe | TTT*  | 1.23 | 1.11 | 1.12 | 1.15 | 1.18 | 1.11 | 1.14 | 1.29 | 1.30 | 1.15 | 1.15 | 1.15 | 1.12 | 1.12 | 1.32 | 1.13 | 1.12 | 1.15 | 1.18 |
|     | TTC   | 0.77 | 0.89 | 0.88 | 0.85 | 0.82 | 0.89 | 0.86 | 0.71 | 0.70 | 0.85 | 0.85 | 0.85 | 0.88 | 0.88 | 0.68 | 0.87 | 0.88 | 0.85 | 0.82 |
| Leu | TTA   | 0.86 | 0.66 | 0.67 | 0.71 | 0.69 | 0.64 | 0.65 | 0.79 | 0.76 | 0.64 | 0.69 | 0.69 | 0.66 | 0.69 | 0.82 | 0.70 | 0.67 | 0.69 | 0.70 |
|     | TTG*  | 1.54 | 1.46 | 1.50 | 1.47 | 1.52 | 1.43 | 1.45 | 1.50 | 1.54 | 1.52 | 1.49 | 1.46 | 1.52 | 1.46 | 1.40 | 1.46 | 1.53 | 1.53 | 1.55 |
|     | CTT   | 1.50 | 1.49 | 1.49 | 1.37 | 1.58 | 1.46 | 1.59 | 1.47 | 1.47 | 1.54 | 1.54 | 1.50 | 1.49 | 1.50 | 1.42 | 1.49 | 1.48 | 1.54 | 1.54 |
|     | CTC   | 0.71 | 0.96 | 0.95 | 1.09 | 0.79 | 0.99 | 0.91 | 0.88 | 0.78 | 0.92 | 0.91 | 0.94 | 0.89 | 0.93 | 0.82 | 0.96 | 0.93 | 0.85 | 0.81 |
|     | CTA   | 0.57 | 0.51 | 0.50 | 0.48 | 0.52 | 0.51 | 0.52 | 0.45 | 0.47 | 0.50 | 0.49 | 0.50 | 0.51 | 0.49 | 0.47 | 0.51 | 0.50 | 0.51 | 0.51 |
|     | CTG   | 0.82 | 0.92 | 0.89 | 0.87 | 0.90 | 0.97 | 0.88 | 0.91 | 0.99 | 0.88 | 0.88 | 0.91 | 0.93 | 0.92 | 1.08 | 0.88 | 0.89 | 0.88 | 0.88 |
| Ile | ATT*  | 1.51 | 1.45 | 1.45 | 1.41 | 1.49 | 1.47 | 1.49 | 1.48 | 1.51 | 1.45 | 1.46 | 1.46 | 1.47 | 1.48 | 1.45 | 1.46 | 1.47 | 1.48 | 1.49 |
|     | ATC   | 0.73 | 0.89 | 0.93 | 0.95 | 0.86 | 0.92 | 0.90 | 0.89 | 0.85 | 0.89 | 0.89 | 0.90 | 0.91 | 0.89 | 0.91 | 0.90 | 0.88 | 0.85 | 0.84 |
| Val | ATA   | 0.77 | 0.66 | 0.62 | 0.64 | 0.65 | 0.61 | 0.61 | 0.63 | 0.64 | 0.66 | 0.65 | 0.64 | 0.62 | 0.63 | 0.64 | 0.64 | 0.65 | 0.67 | 0.67 |
|     | GTT*  | 1.65 | 1.55 | 1.58 | 1.51 | 1.64 | 1.62 | 1.61 | 1.56 | 1.59 | 1.64 | 1.62 | 1.55 | 1.55 | 1.61 | 1.52 | 1.55 | 1.57 | 1.60 | 1.62 |
|     | GTC   | 0.64 | 0.82 | 0.81 | 0.85 | 0.68 | 0.81 | 0.78 | 0.81 | 0.76 | 0.75 | 0.76 | 0.82 | 0.76 | 0.73 | 0.79 | 0.81 | 0.74 | 0.72 | 0.71 |
|     | GTA   | 0.65 | 0.53 | 0.53 | 0.51 | 0.56 | 0.51 | 0.52 | 0.53 | 0.54 | 0.52 | 0.54 | 0.53 | 0.53 | 0.52 | 0.54 | 0.53 | 0.56 | 0.58 | 0.56 |
|     | GTG   | 1.06 | 1.11 | 1.08 | 1.13 | 1.12 | 1.05 | 1.09 | 1.11 | 1.11 | 1.09 | 1.08 | 1.10 | 1.16 | 1.14 | 1.15 | 1.11 | 1.13 | 1.10 | 1.11 |
| Ser | TCT*  | 1.57 | 1.46 | 1.47 | 1.41 | 1.53 | 1.58 | 1.47 | 1.42 | 1.42 | 1.50 | 1.55 | 1.51 | 1.47 | 1.47 | 1.37 | 1.45 | 1.48 | 1.52 | 1.48 |
|     | TCC   | 0.72 | 1.00 | 0.98 | 1.10 | 0.76 | 0.87 | 0.85 | 1.20 | 1.08 | 0.83 | 0.84 | 1.01 | 0.81 | 0.91 | 1.29 | 1.02 | 0.83 | 0.78 | 0.76 |
|     | TCA   | 1.45 | 1.30 | 1.32 | 1.22 | 1.41 | 1.38 | 1.39 | 1.23 | 1.33 | 1.38 | 1.37 | 1.30 | 1.37 | 1.26 | 1.17 | 1.32 | 1.39 | 1.38 | 1.43 |
|     | TCG   | 0.43 | 0.49 | 0.49 | 0.66 | 0.42 | 0.49 | 0.50 | 0.49 | 0.47 | 0.50 | 0.49 | 0.51 | 0.52 | 0.59 | 0.55 | 0.51 | 0.50 | 0.48 | 0.47 |

|     |       |      |      |      |      |      |      |      |      |      |      |      |      |      |      |      |      |      |      |      |
|-----|-------|------|------|------|------|------|------|------|------|------|------|------|------|------|------|------|------|------|------|------|
| Pro | AGT*  | 1.06 | 0.81 | 0.84 | 0.81 | 1.03 | 0.84 | 0.90 | 0.81 | 0.86 | 0.92 | 0.90 | 0.83 | 0.92 | 0.85 | 0.71 | 0.86 | 0.92 | 0.97 | 1.00 |
|     | AGC   | 0.77 | 0.96 | 0.90 | 0.80 | 0.87 | 0.84 | 0.89 | 0.87 | 0.84 | 0.87 | 0.85 | 0.83 | 0.91 | 0.91 | 0.92 | 0.84 | 0.87 | 0.88 | 0.85 |
|     | CCCT* | 1.51 | 1.07 | 1.17 | 1.18 | 1.47 | 1.45 | 1.44 | 1.04 | 1.08 | 1.42 | 1.42 | 1.24 | 1.40 | 1.29 | 0.92 | 1.28 | 1.40 | 1.48 | 1.48 |
| Thr | CCC   | 0.59 | 1.07 | 1.01 | 1.09 | 0.63 | 0.74 | 0.71 | 1.39 | 1.29 | 0.68 | 0.73 | 0.98 | 0.66 | 0.79 | 1.60 | 0.92 | 0.68 | 0.64 | 0.65 |
|     | CCA   | 1.45 | 1.27 | 1.25 | 1.07 | 1.44 | 1.30 | 1.34 | 1.04 | 1.09 | 1.37 | 1.32 | 1.21 | 1.34 | 1.30 | 0.94 | 1.23 | 1.38 | 1.38 | 1.38 |
|     | CCG   | 0.45 | 0.59 | 0.57 | 0.66 | 0.45 | 0.51 | 0.51 | 0.54 | 0.54 | 0.53 | 0.53 | 0.58 | 0.60 | 0.62 | 0.54 | 0.58 | 0.54 | 0.50 | 0.48 |
|     | ACT*  | 1.49 | 1.16 | 1.25 | 1.28 | 1.46 | 1.51 | 1.43 | 1.15 | 1.27 | 1.43 | 1.45 | 1.32 | 1.44 | 1.35 | 1.09 | 1.36 | 1.42 | 1.45 | 1.45 |
|     | ACC   | 0.75 | 1.10 | 1.08 | 1.08 | 0.85 | 0.97 | 0.92 | 1.19 | 1.14 | 0.93 | 0.89 | 1.04 | 0.93 | 0.93 | 1.30 | 0.99 | 0.91 | 0.90 | 0.87 |
| Ala | ACA   | 1.34 | 1.21 | 1.16 | 1.05 | 1.30 | 1.11 | 1.21 | 1.14 | 1.14 | 1.18 | 1.20 | 1.13 | 1.16 | 1.12 | 1.11 | 1.15 | 1.21 | 1.23 | 1.25 |
|     | ACG   | 0.41 | 0.53 | 0.51 | 0.58 | 0.40 | 0.41 | 0.45 | 0.53 | 0.44 | 0.46 | 0.46 | 0.51 | 0.47 | 0.60 | 0.49 | 0.50 | 0.46 | 0.42 | 0.43 |
|     | GCT*  | 1.66 | 1.44 | 1.54 | 1.49 | 1.71 | 1.66 | 1.61 | 1.42 | 1.45 | 1.66 | 1.68 | 1.55 | 1.62 | 1.64 | 1.26 | 1.54 | 1.62 | 1.69 | 1.66 |
| Tyr | GCC   | 0.70 | 0.96 | 0.93 | 1.03 | 0.72 | 0.94 | 0.85 | 1.06 | 1.00 | 0.85 | 0.82 | 0.91 | 0.84 | 0.84 | 1.20 | 0.90 | 0.83 | 0.79 | 0.77 |
|     | GCA   | 1.33 | 1.13 | 1.11 | 1.00 | 1.27 | 1.06 | 1.13 | 1.04 | 1.11 | 1.14 | 1.16 | 1.08 | 1.19 | 1.16 | 1.00 | 1.12 | 1.20 | 1.21 | 1.24 |
|     | GCG   | 0.32 | 0.48 | 0.42 | 0.48 | 0.30 | 0.34 | 0.42 | 0.47 | 0.44 | 0.34 | 0.34 | 0.45 | 0.34 | 0.36 | 0.55 | 0.44 | 0.35 | 0.32 | 0.32 |
| His | TAT*  | 1.22 | 1.07 | 1.07 | 1.04 | 1.17 | 1.09 | 1.13 | 1.07 | 1.10 | 1.11 | 1.13 | 1.09 | 1.08 | 1.12 | 1.07 | 1.06 | 1.10 | 1.13 | 1.12 |
|     | TAC   | 0.78 | 0.93 | 0.93 | 0.96 | 0.83 | 0.91 | 0.87 | 0.93 | 0.90 | 0.89 | 0.87 | 0.91 | 0.92 | 0.88 | 0.93 | 0.94 | 0.90 | 0.87 | 0.88 |
| Gln | CAT*  | 1.31 | 0.96 | 1.01 | 1.05 | 1.20 | 1.19 | 1.18 | 1.05 | 1.12 | 1.17 | 1.20 | 1.09 | 1.18 | 1.15 | 1.02 | 1.09 | 1.17 | 1.20 | 1.23 |
|     | CAC   | 0.69 | 1.04 | 0.99 | 0.95 | 0.80 | 0.81 | 0.82 | 0.95 | 0.88 | 0.83 | 0.80 | 0.91 | 0.82 | 0.85 | 0.98 | 0.91 | 0.83 | 0.80 | 0.77 |
| Asn | CAA*  | 1.09 | 1.09 | 1.06 | 1.06 | 1.01 | 1.02 | 1.01 | 1.15 | 1.13 | 1.00 | 1.02 | 1.06 | 0.97 | 1.02 | 1.18 | 1.05 | 1.01 | 1.01 | 1.01 |
|     | CAG   | 0.91 | 0.91 | 0.94 | 0.94 | 0.99 | 0.98 | 0.99 | 0.85 | 0.87 | 1.00 | 0.98 | 0.94 | 1.03 | 0.98 | 0.82 | 0.95 | 0.99 | 0.99 | 0.99 |
| Lys | AAT*  | 1.30 | 1.06 | 1.09 | 1.11 | 1.23 | 1.14 | 1.17 | 1.09 | 1.15 | 1.19 | 1.16 | 1.14 | 1.17 | 1.15 | 1.04 | 1.11 | 1.17 | 1.20 | 1.22 |
|     | AAC   | 0.70 | 0.94 | 0.91 | 0.89 | 0.77 | 0.86 | 0.83 | 0.91 | 0.85 | 0.81 | 0.84 | 0.86 | 0.83 | 0.85 | 0.96 | 0.89 | 0.83 | 0.80 | 0.78 |
| Asp | AAA   | 0.99 | 0.99 | 0.95 | 1.07 | 0.86 | 0.87 | 0.87 | 1.30 | 1.26 | 0.86 | 0.90 | 1.02 | 0.83 | 0.94 | 1.35 | 1.00 | 0.88 | 0.87 | 0.88 |
|     | AAG*  | 1.01 | 1.01 | 1.05 | 0.93 | 1.14 | 1.13 | 1.13 | 0.70 | 0.74 | 1.14 | 1.10 | 0.98 | 1.17 | 1.06 | 0.65 | 1.00 | 1.12 | 1.13 | 1.12 |
| Glu | GAT*  | 1.42 | 1.25 | 1.27 | 1.25 | 1.37 | 1.32 | 1.34 | 1.24 | 1.30 | 1.33 | 1.35 | 1.29 | 1.33 | 1.32 | 1.17 | 1.31 | 1.34 | 1.36 | 1.37 |
|     | GAC   | 0.58 | 0.75 | 0.73 | 0.75 | 0.63 | 0.68 | 0.66 | 0.76 | 0.70 | 0.67 | 0.65 | 0.71 | 0.67 | 0.68 | 0.83 | 0.69 | 0.66 | 0.64 | 0.63 |
| Cys | GAA*  | 1.09 | 1.03 | 1.04 | 1.03 | 1.03 | 0.99 | 1.03 | 1.15 | 1.14 | 0.99 | 1.02 | 1.06 | 0.98 | 1.03 | 1.17 | 1.04 | 1.01 | 1.01 | 1.02 |
|     | GAG   | 0.91 | 0.97 | 0.96 | 0.97 | 0.97 | 1.01 | 0.97 | 0.85 | 0.86 | 1.01 | 0.98 | 0.94 | 1.02 | 0.97 | 0.83 | 0.96 | 0.99 | 0.99 | 0.98 |
|     | TGT*  | 1.13 | 0.95 | 0.97 | 1.00 | 1.07 | 0.95 | 1.10 | 0.98 | 1.03 | 1.00 | 1.03 | 1.00 | 0.99 | 1.01 | 0.96 | 0.97 | 0.99 | 1.04 | 1.04 |

|     |      |      |      |      |      |      |      |      |      |      |      |      |      |      |      |      |      |      |      |      |
|-----|------|------|------|------|------|------|------|------|------|------|------|------|------|------|------|------|------|------|------|------|
| Arg | TGC  | 0.87 | 1.05 | 1.03 | 1.00 | 0.93 | 1.05 | 0.90 | 1.02 | 0.97 | 1.00 | 0.97 | 1.00 | 1.01 | 0.99 | 1.04 | 1.03 | 1.01 | 0.96 | 0.96 |
|     | CGT  | 0.80 | 0.78 | 0.83 | 0.84 | 0.83 | 0.87 | 0.79 | 0.74 | 0.80 | 0.90 | 0.85 | 0.85 | 0.84 | 0.87 | 0.73 | 0.85 | 0.86 | 0.92 | 0.88 |
|     | CGC  | 0.49 | 0.97 | 0.87 | 0.80 | 0.53 | 0.64 | 0.78 | 0.72 | 0.75 | 0.63 | 0.63 | 0.83 | 0.61 | 0.65 | 0.80 | 0.81 | 0.61 | 0.57 | 0.58 |
|     | CGA  | 0.70 | 0.71 | 0.68 | 0.65 | 0.71 | 0.61 | 0.66 | 0.56 | 0.58 | 0.66 | 0.65 | 0.67 | 0.61 | 0.66 | 0.54 | 0.68 | 0.66 | 0.68 | 0.64 |
|     | CGG  | 0.56 | 0.66 | 0.65 | 0.73 | 0.51 | 0.57 | 0.61 | 0.79 | 0.78 | 0.54 | 0.55 | 0.70 | 0.68 | 0.60 | 0.96 | 0.63 | 0.55 | 0.54 | 0.54 |
|     | AGA* | 1.96 | 1.54 | 1.58 | 1.54 | 1.83 | 1.76 | 1.62 | 1.58 | 1.47 | 1.76 | 1.80 | 1.54 | 1.62 | 1.63 | 1.40 | 1.64 | 1.78 | 1.76 | 1.78 |
| Gly | AGG  | 1.49 | 1.35 | 1.39 | 1.45 | 1.59 | 1.56 | 1.53 | 1.61 | 1.63 | 1.51 | 1.53 | 1.41 | 1.63 | 1.58 | 1.58 | 1.40 | 1.55 | 1.54 | 1.59 |
|     | GGT  | 1.21 | 1.01 | 1.10 | 1.05 | 1.21 | 1.24 | 1.14 | 0.83 | 0.94 | 1.22 | 1.20 | 1.05 | 1.12 | 1.13 | 0.76 | 1.05 | 1.18 | 1.21 | 1.22 |
|     | GGC  | 0.74 | 0.84 | 0.85 | 0.90 | 0.80 | 0.90 | 0.89 | 0.73 | 0.77 | 0.85 | 0.85 | 0.82 | 0.89 | 0.85 | 0.81 | 0.88 | 0.85 | 0.80 | 0.79 |
|     | GGA* | 1.28 | 1.20 | 1.15 | 1.05 | 1.31 | 1.14 | 1.23 | 1.03 | 1.04 | 1.21 | 1.22 | 1.16 | 1.20 | 1.20 | 0.92 | 1.17 | 1.22 | 1.25 | 1.23 |
|     | GGG  | 0.77 | 0.96 | 0.90 | 0.99 | 0.68 | 0.72 | 0.74 | 1.41 | 1.25 | 0.72 | 0.73 | 0.97 | 0.79 | 0.82 | 1.51 | 0.90 | 0.75 | 0.75 | 0.75 |

Supplementary Table 2. GC<sub>3</sub> variation and stress association across *Citrus* species and *P. trifoliata*.

| Organism                                   | GC <sub>3</sub> * | Stress (S) | Not associated with stress (NS) | Ratio S/NS  |
|--------------------------------------------|-------------------|------------|---------------------------------|-------------|
| <i>C. sinensis</i>                         | High              | 945        | 4289                            | 0.22033108  |
| <i>C. sinensis</i>                         | Mid               | 1857       | 9534                            | 0.194776589 |
| <i>C. sinensis</i>                         | Low               | 1699       | 9944                            | 0.170856798 |
| <i>P. trifoliata</i>                       | High              | 951        | 2562                            | 0.371194379 |
| <i>P. trifoliata</i>                       | Mid               | 591        | 2594                            | 0.227833462 |
| <i>P. trifoliata</i>                       | Low               | 281        | 1492                            | 0.188337802 |
| <i>C. reticulata</i>                       | High              | 1718       | 4251                            | 0.404140202 |
| <i>C. reticulata</i>                       | Mid               | 1067       | 4010                            | 0.266084788 |
| <i>C. reticulata</i>                       | Low               | 541        | 2590                            | 0.208880309 |
| <i>C. aurantiifolia</i>                    | High              | 338        | 744                             | 0.454301075 |
| <i>C. aurantiifolia</i>                    | Mid               | 126        | 512                             | 0.24609375  |
| <i>C. aurantiifolia</i>                    | Low               | 63         | 360                             | 0.175       |
| <i>C. aurantium</i>                        | High              | 331        | 860                             | 0.384883721 |
| <i>C. aurantium</i>                        | Mid               | 150        | 723                             | 0.20746888  |
| <i>C. aurantium</i>                        | Low               | 102        | 415                             | 0.245783133 |
| <i>C. japonica</i> var <i>margarita</i>    | High              | 13         | 28                              | 0.464285714 |
| <i>C. japonica</i> var <i>margarita</i>    | Mid               | 9          | 35                              | 0.257142857 |
| <i>C. japonica</i> var <i>margarita</i>    | Low               | 4          | 19                              | 0.210526316 |
| <i>C. clementina</i> × <i>C. tangerina</i> | High              | 22         | 63                              | 0.349206349 |
| <i>C. clementina</i> × <i>C. tangerina</i> | Mid               | 12         | 57                              | 0.210526316 |

|                                            |      |     |     |             |
|--------------------------------------------|------|-----|-----|-------------|
| <i>C. clementina</i> × <i>C. tangerina</i> | Low  | 7   | 47  | 0.14893617  |
| <i>C. sunki</i>                            | High | 72  | 163 | 0.441717791 |
| <i>C. sunki</i>                            | Mid  | 49  | 154 | 0.318181818 |
| <i>C. sunki</i>                            | Low  | 13  | 53  | 0.245283019 |
| <i>C. jambhiri</i>                         | High | 19  | 55  | 0.345454545 |
| <i>C. jambhiri</i>                         | Mid  | 10  | 46  | 0.217391304 |
| <i>C. jambhiri</i>                         | Low  | 8   | 53  | 0.150943396 |
| <i>C. limonia</i>                          | High | 110 | 320 | 0.34375     |
| <i>C. limonia</i>                          | Mid  | 88  | 424 | 0.20754717  |
| <i>C. limonia</i>                          | Low  | 54  | 231 | 0.233766234 |
| <i>C. limettioides</i>                     | High | 176 | 425 | 0.414117647 |
| <i>C. limettioides</i>                     | Mid  | 99  | 359 | 0.275766017 |
| <i>C. limettioides</i>                     | Low  | 53  | 218 | 0.243119266 |
| <i>C. reshni</i>                           | High | 104 | 304 | 0.342105263 |
| <i>C. reshni</i>                           | Mid  | 74  | 281 | 0.263345196 |
| <i>C. reshni</i>                           | Low  | 47  | 177 | 0.265536723 |
| <i>C. medica</i>                           | High | 23  | 56  | 0.410714286 |
| <i>C. medica</i>                           | Mid  | 13  | 54  | 0.240740741 |
| <i>C. medica</i>                           | Low  | 10  | 42  | 0.238095238 |
| <i>C. sinensis</i> × <i>P. trifoliata</i>  | High | 47  | 139 | 0.338129496 |
| <i>C. sinensis</i> × <i>P. trifoliata</i>  | Mid  | 32  | 138 | 0.231884058 |
| <i>C. sinensis</i> × <i>P. trifoliata</i>  | Low  | 6   | 62  | 0.096774194 |
| <i>C. reticulata</i> × <i>C. temple</i>    | High | 135 | 441 | 0.306122449 |

|                                           |      |      |      |             |
|-------------------------------------------|------|------|------|-------------|
| <i>C. reticulata</i> × <i>C. temple</i>   | Mid  | 67   | 276  | 0.242753623 |
| <i>C. reticulata</i> × <i>C. temple</i>   | Low  | 28   | 148  | 0.189189189 |
| <i>C. unshiu</i>                          | High | 161  | 624  | 0.258012821 |
| <i>C. unshiu</i>                          | Mid  | 119  | 501  | 0.23752495  |
| <i>C. unshiu</i>                          | Low  | 53   | 308  | 0.172077922 |
| <i>C. clementina</i>                      | High | 1522 | 7032 | 0.216439135 |
| <i>C. clementina</i>                      | Mid  | 921  | 4730 | 0.194714588 |
| <i>C. clementina</i>                      | Low  | 376  | 2137 | 0.17594759  |
| <i>C. paradisi</i>                        | High | 72   | 289  | 0.249134948 |
| <i>C. paradisi</i>                        | Mid  | 54   | 257  | 0.210116732 |
| <i>C. paradisi</i>                        | Low  | 35   | 196  | 0.178571429 |
| <i>C. paradisi</i> × <i>P. trifoliata</i> | High | 96   | 213  | 0.450704225 |
| <i>C. paradisi</i> × <i>P. trifoliata</i> | Mid  | 80   | 302  | 0.264900662 |
| <i>C. paradisi</i> × <i>P. trifoliata</i> | Low  | 51   | 256  | 0.19921875  |

\* High GC<sub>3</sub>= above 0.46; Middle GC<sub>3</sub> are between 0.39-0.46; Low GC<sub>3</sub> = <0.39



Supplementary Figure 1. Plot for coordinates of first two major axes of correspondence analysis on RSCU for *Citrus* species and *P. trifoliata* genes. The genes have been classified according to the GC<sub>3s</sub> richness. Species are in the following order: A=*C. sinensis*; B=*C. aurantifolia*; C=*C. aurantium*; D=*C. clementina*; E=*C. clementina* × *C. tangerina*; F= *C. jambhiri*; G=*C. japonica* var *margarita*; H=*C. limettioides*; I=*C. limonia*; J=*C. medica*; K=*C. reshni*; L=*C. reticulata*; M=*C. reticulata* × *C. temple*; N=*C. sinensis* × *P. trifoliata*; O=*C. sunki*; P=*P. trifoliata*; Q=*C. unshiu*; R=*C. paradisi*; S=*C. paradisi* × *P. trifoliata*.

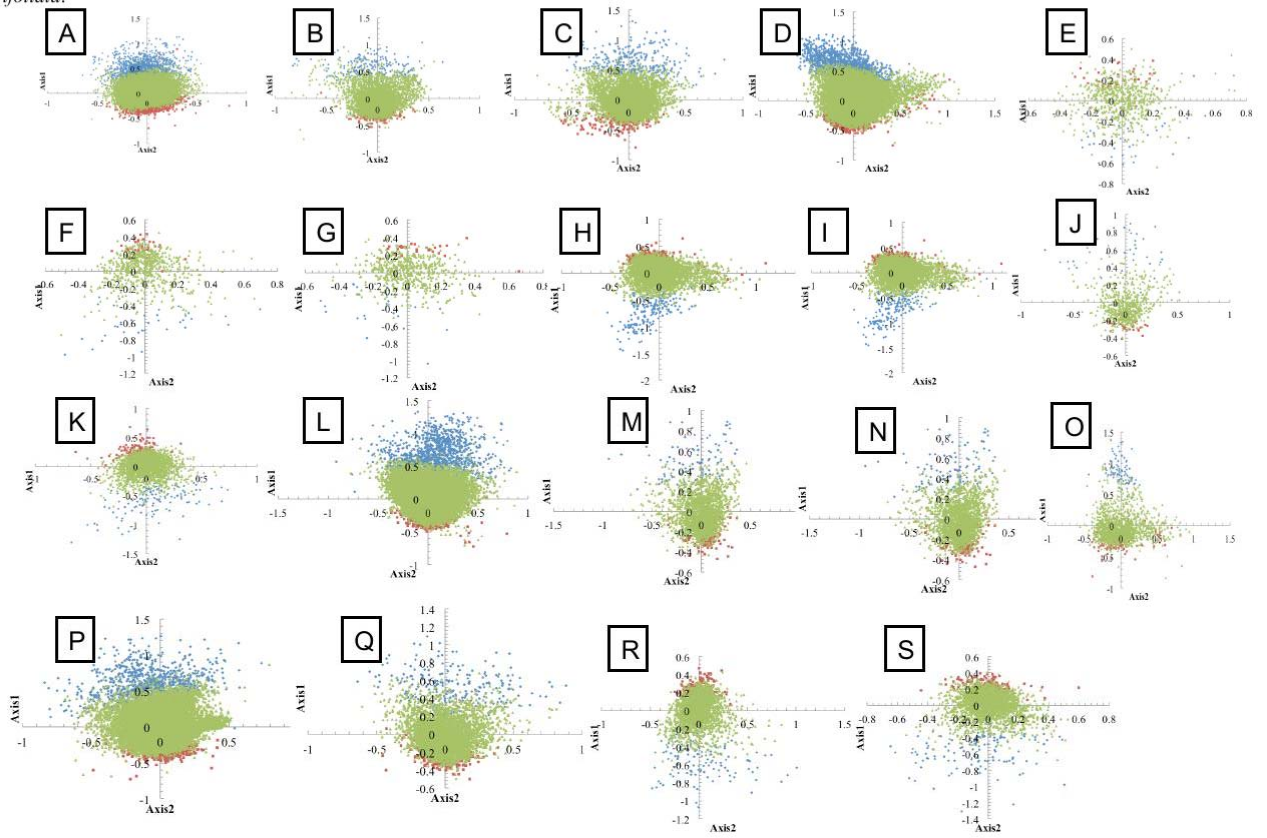

Supplementary Figure 2. CG<sub>3</sub> skew across *Citrus* species and *P.trifoliata*. Species order: A=*C. sinensis*; B= *C. aurantifolia*; C= *C. aurantium*; D=*C. clementina*; E=*C. clementina* × *C. tangerina*; F=*C. jambhiri*; G=*C. japonica* var *margarita*; H=*C. limettioides*; I=*C. limonia*; J=*C. medica*; K=*C. reshni*; L=*C. reticulata*; M=*C. reticulata* × *C. temple*; N=*C. sinensis* × *P. trifoliata*; O=*C. sunki*; P=*P. trifoliata*; Q=*C. unshiu*; R=*C. paradisi*; S=*C. paradisi* × *P. trifoliata*. These plots show gradients of CG<sub>3</sub> skew for 5% of GC<sub>3</sub>-rich and GC<sub>3</sub>-poor genes for all analyzed genomes. Gradients from 5' and 3' ends of the CDS are shown in the same plot, separated by a vertical line.

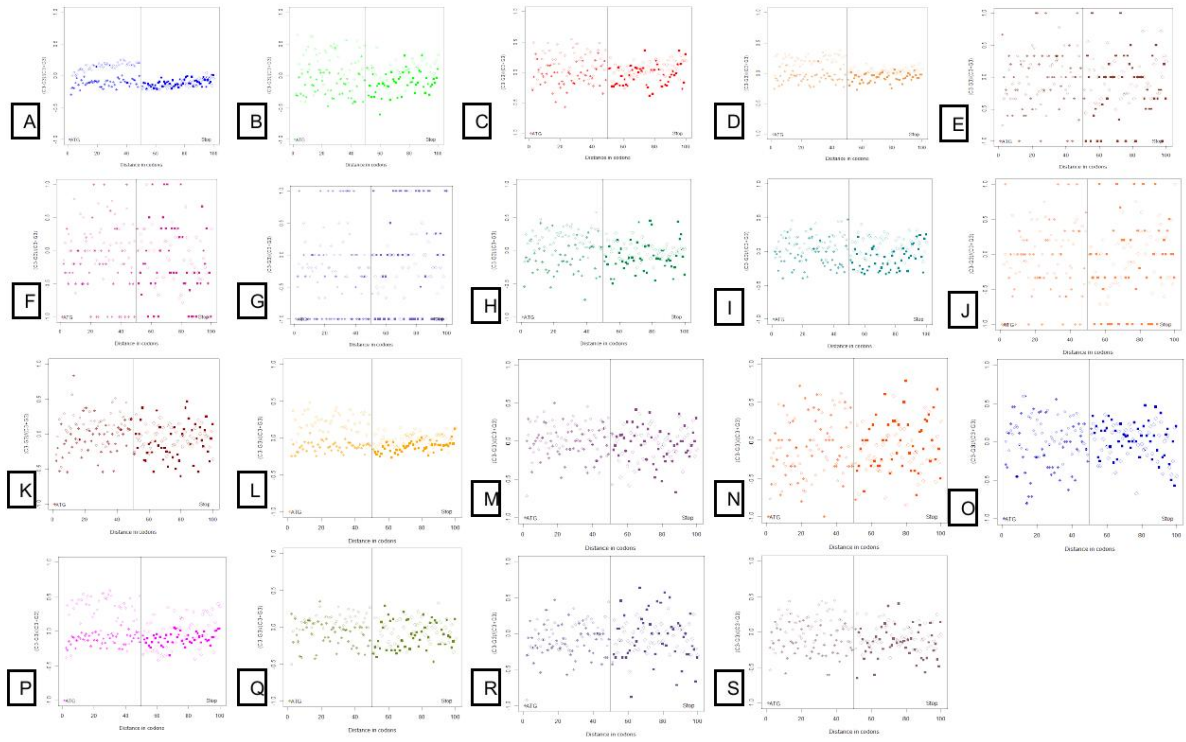

Supplementary Figure 3A An overview of *Citrus* phylogeny using the genome and frame corrected coding regions: (A) All the proteins were compared and a suggestive phylogeny was built on the basis of the co-orthologous proteins. In the figure, branch labels show the number of common genes in the subtrees. Branch lengths represent the number of new common genes since the last node.

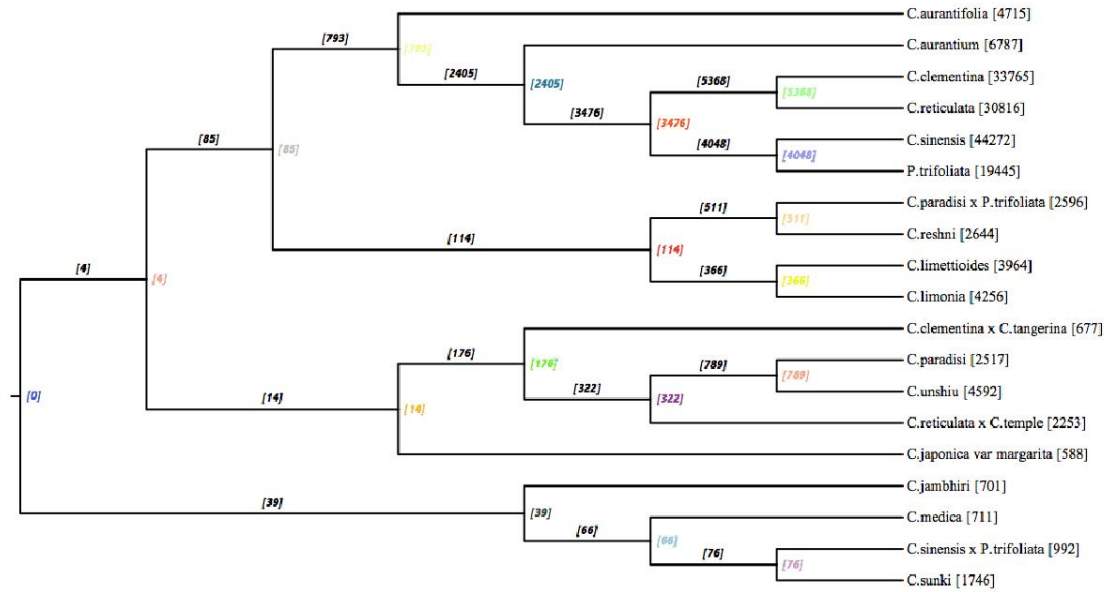

Supplementary Figure 3B An overview of *Citrus* phylogeny using the genome and frame corrected coding regions: Phylogenetic tree obtained in figure 3A was re-rooted using *P. trifoliata* as an out-group species. In the figure, branch labels show the number of common genes in the subtrees. Branch lengths represent the number of new common genes since the last node.

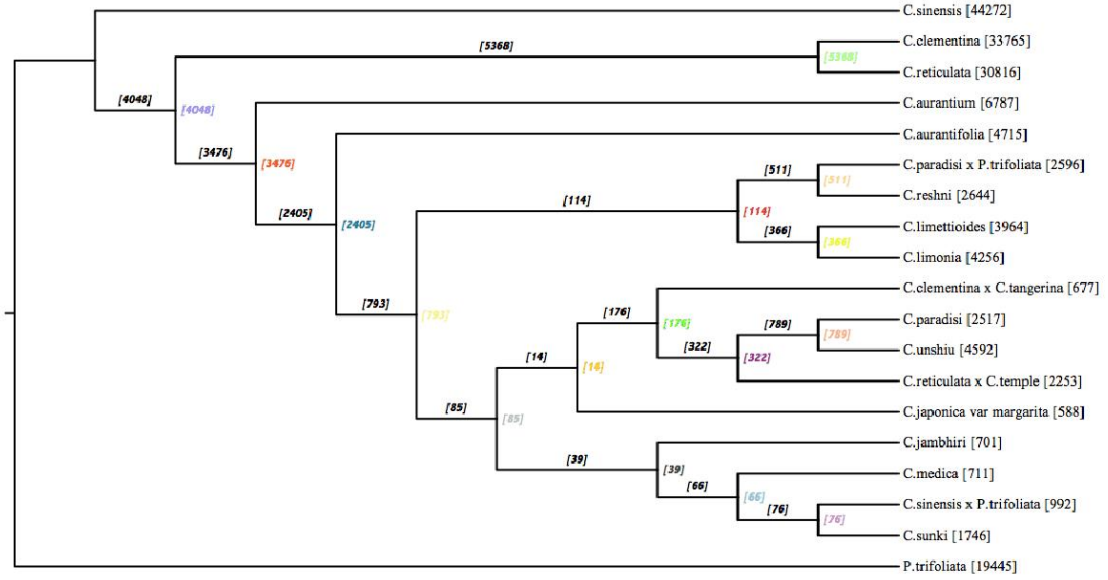

Supplement: supp_dss039_dss039supp.pdf [file supp_dss039_dss039supp.pdf]
